# Supplementary material
Source: PubMed Central journal article supplement (PMC6547122)
Supplement: jamaneurol-76-809-s001.pdf [file jamaneurol-76-809-s001.pdf]

## Supplementary Online Content

Wingo TS, Cutler DJ, Wingo AP, et al. Association of early-onset Alzheimer disease with elevated low-density lipoprotein cholesterol levels and rare genetic coding variants of *APOB*. *JAMA Neurol*. Published online May 28, 2019. doi:10.1001/jamaneurol.2019.0648

**eMethods.** Participants and Data Analysis

**eFigure.** Normalized LDLC for Carriers of *APOB* Variants

**eTable 1.** Known Pathogenic Mutations Identified

**eTable 2.** Results of Gene-Based Burden *t* Test for *APP*

**eTable 3.** Results of Gene-Based Burden *t* Test for *PSEN1*

**eTable 4.** Results of Gene-Based Burden *t* Test for *PSEN2*

**eTable 5.** Variants Identified in *APOB*

**eReferences.**

This supplementary material has been provided by the authors to give readers additional information about their work.

## **eMethods. Participants and Data Analysis**

### ***Study Population***

All individuals were recruited from U.S. ADRCs or ADCs using established comprehensive research evaluations and diagnostic criteria<sup>2-4</sup>. EOAD cases were defined as having either probable or definite AD using the NINCDS-ADRDA Work Group criteria<sup>4</sup> with symptoms beginning on or before age 65, and controls were cognitively normal individuals over 60 years old. Samples available from Emory University and UCSF ADRCs had both genetic material frozen plasma available for analysis. Additional samples with available genetic material were obtained from the other ADRCs and ADCs from the National Cell Repository for Alzheimer's Disease (NCRAD) biorepository bank. Samples were restricted to Caucasians because only this group had sufficient sample size for meaningful testing. For the samples obtained from NCRAD, we obtained demographic data and *APOE* genotyping on available samples from the National Alzheimer's Coordinating Center (NACC). All participants or their legal guardians gave informed consent. Samples from each center were obtained using research protocols approved by their respective institutional review boards. All genetic analyses for this work were approved by the Emory University Institutional Review Board. The Emory ADRC samples constituted the discovery sample. There were two replication datasets that were sequenced independently – the UCSF ADRC samples and the ADRC/ADCs samples obtained from NCRAD.

### ***LDLC measurement***

Plasma samples that had not previously been thawed were available for 44% (267 / 667) of the Emory and UCSF samples for LDLc measurement. Samples were randomized with respect to sex, disease status, and age-at-draw for the Emory and UCSF, which were analyzed together. Lipid levels were determined by colorimetric method on the Beckman AU480 chemistry analyzer

at the Emory Lipid Research Laboratory (Atlanta, GA) for lipid levels analysis. Total cholesterol and total triglycerides were assayed using reagents from Beckman Diagnostics and LDLc and HDLc levels were determined by the homogeneous assay methods using reagents from Sekisui Diagnostics. ApoB levels were determined by immunoturbidometric methods using reagents from Sekisui Diagnostics.

### ***Targeted resequencing***

Genomic DNA was obtained from human blood for the Emory samples using the Genra Puregene kit (Qiagen) following the manufacturer's protocols. For the UCSF and NCRAD samples extracted genomic DNA was provided by their respective centers. Two sets of capture primers were designed using conditions recommended for the Access Array System (Fluidigm, San Francisco, CA) by the manufacturer using the MPD software<sup>5</sup>. The first set was designed to capture all exonic regions and 15 bp of flanking intronic regions of *APOB*, *APP*, *PSEN1*, *PSEN2*, and 25 common X chromosome markers. The second set was designed to capture 400 ancestrally informative and 25 common X chromosome markers. Sequence capture was performed using the Access Array System (Fluidigm, San Francisco, CA) per the manufacturer's protocol in batches of 48 samples. Within each dataset, samples were randomly plated with respect to affectation, sex, education, and *APOE* genotype to minimize the influence of batch effects. All samples were barcoded using the manufacturer's protocol and 150bp (first primer set) and 250bp (second primer set) paired-ended sequencing was performed on an MiSeq (Illumina, San Diego, CA).

### ***Base calling and quality control***

Raw sequencing reads were mapped to the GRCh38 build of the human genome using PEMapper and variant sites called using PECOller using default values<sup>6</sup>. All variant annotation

and filtering was performed using Bystro<sup>7</sup>. Quality control occurred in two phases. First, samples were examined within batches and amplicons with >3 standard deviation (SD) missing sites were dropped. Samples with >3 SD missing data were dropped, and batches with >3 SD sample failures were excluded. Samples from passing batches were combined and samples with >3 SD missing data or >3 SD excess heterozygosity were dropped. In total, 2 batches and 71 individual samples were removed from further analysis. Genotyping from all remaining batches were merged and variant sites with >5% missing data and those that failed Hardy-Weinberg filtering at  $10^{-7}$  were excluded. Samples showing discordance between demographic and genetic sex, defined as within 3 SD of the X chromosome heterozygosity for the recorded sex, were removed (n=19). Cryptically related or duplicate samples were identified by identity-by-state sharing using PLINK<sup>8</sup> and removed (n=32). Unlinked ancestrally informative markers were used to infer eigenvectors for principal-component analysis using EIGENSTRAT<sup>9</sup> and >6 SD outliers (n=1) were removed. Summaries of the sample demographics were made using samples that passed quality control measures to this point.

For the *APOB* gene-based analyses, samples with probable or possible AD-causing mutations in *APP*, *PSEN1*, or *PSEN2* were removed from further analysis because these mutations presumably explain EOAD in those individuals. Probable or possible AD-causing mutations were defined by ClinVar and the Alzheimer's Disease and Frontotemporal Dementia Mutation Database<sup>10,11</sup>.

### ***APOE* Genotyping**

*APOE* genotyping was performed in triplicate using custom TaqMan assays to rs7412 and rs426758 following the manufacturer's protocol using an ABI 7300 Real-Time PCR machine.

### ***Statistical Analysis***

Plasma lipid analysis was performed in R (v3.3.1)<sup>12</sup>, using glm for regression and built-in functions unless otherwise specified. All variables were tested for missingness that disproportionately affected either cases or controls within each center (e.g., Emory, UCSF, and NCRAD) by either Fisher's Exact Test when groups included counts less than 10 or Chi-squared test when all groups included 10 or more counts. Estimates of the liability to AD were generated using age-at-onset for cases and age-at-enrollment for controls, sex, and affection status by linear interpolation, as described previously<sup>13</sup>. Linear regression was used to test for association between liability to EOAD and copies of *APOE E4* alleles adjusting for sex and sample source. To estimate the variance explained by *APOE E4*, we used liability to EOAD as the outcome and fitted one linear model with copies of *APOE E4* and another without copies of *APOE E4*, adjusting for the same covariates (i.e., sex and sample source). The proportion of the variance explained by *APOE E4* was calculated as the difference in  $R^2$  between the two models.

To estimate the variance of AD liability explained by LDLc, we fitted one linear model with LDLc and another without LDLc, adjusting for sex, education, and copies of *APOE E4* alleles, and calculated the difference in  $R^2$  between the two models.

**eFigure. Normalized LDLc for Carriers of *APOB* Variants**

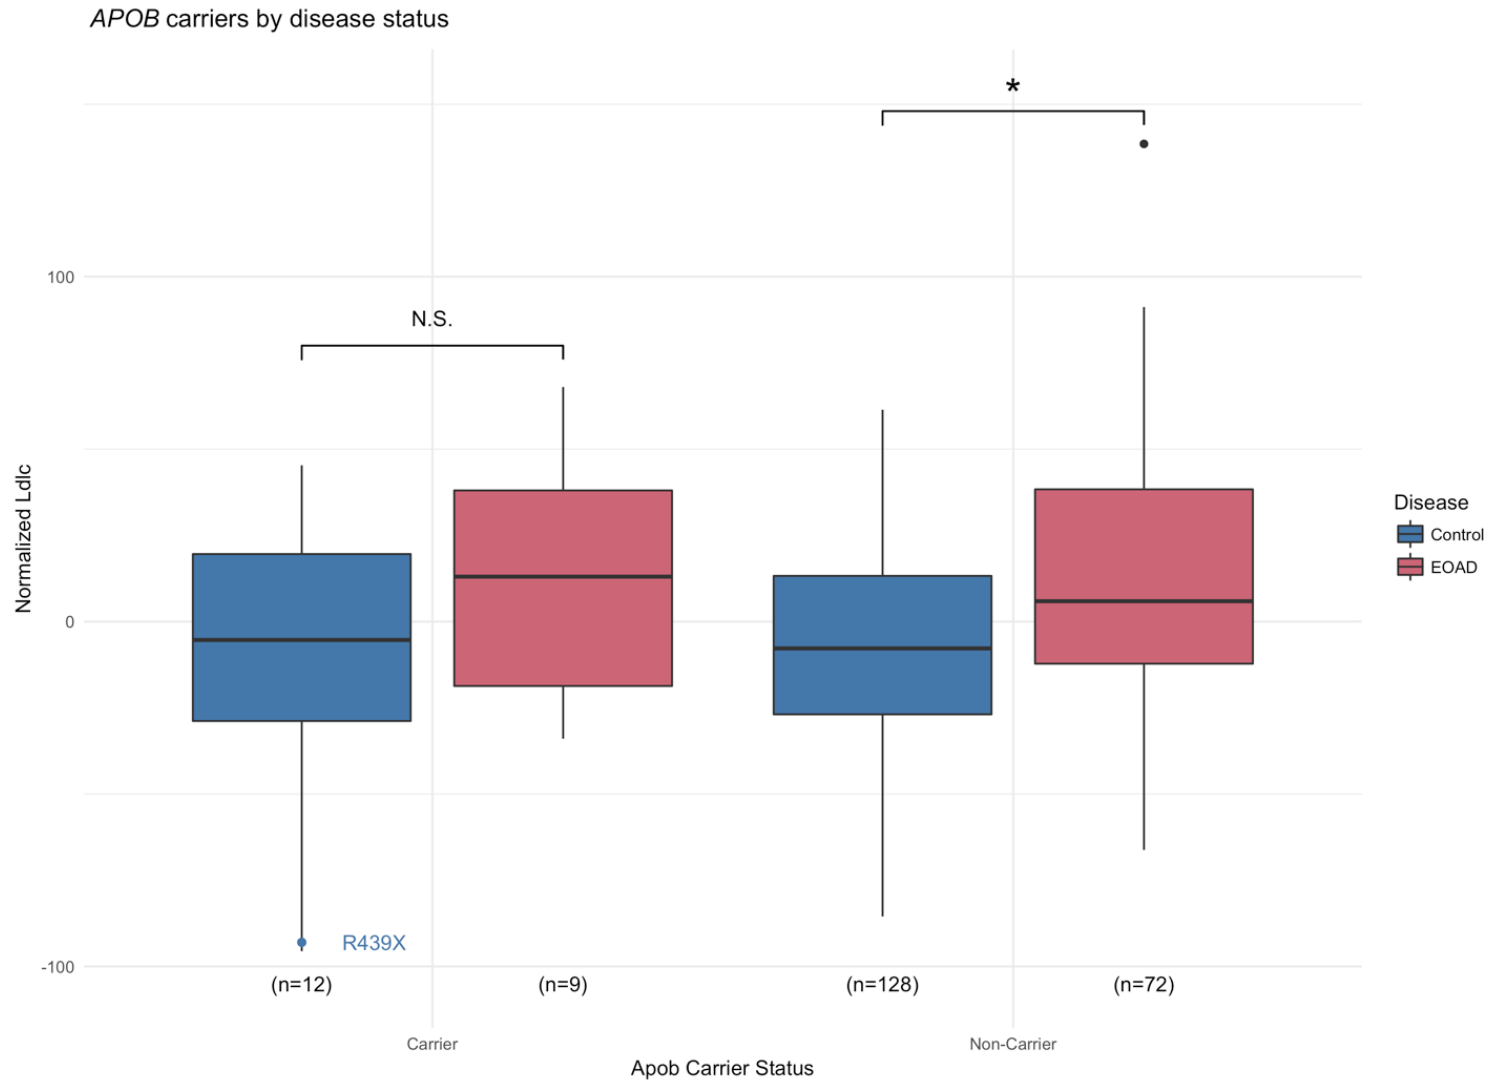

Normalized LDLc levels are adjusted for sex, batch, education, and copies of *APOE E4* alleles. **A.** Normalized LDLc levels among carriers of *APOB* variants for EOAD cases and controls. EOAD cases with rare coding *APOB* variants tested in this study do not have a statistically significant difference in normalized LDLc compared to controls (N=21; p=0.28) by logistic regression, which is likely due to limited power; however, we continue to observe higher LDLc among EOAD cases compared to controls suggesting the involvement of other genetic or environmental factors (N=200; p=2.6×10<sup>-4</sup>). We also find that not all *APOB* variants act to increase LDLc as evidenced by a control with low LDLc (red point) who carries a stop-gain variant in *APOB* (p.439R>X) previously associated with low LDLc<sup>1</sup>.

| <b>eTable 1. Known Pathogenic Mutations Identified</b> |                 |                  |                                    |
|--------------------------------------------------------|-----------------|------------------|------------------------------------|
| <b>Chromosome</b>                                      | <b>Position</b> | <b>Exon</b>      | <b>Mutation</b>                    |
| chr1                                                   | 226888112       | EX6 TM-III       | g.6206A>G(Met174Val)               |
| chr1                                                   | 226888975       | EX7 TM-V         | g.7069T>C(Leu238Pro)               |
| chr14                                                  | 73170945        | EX4 N-Term       | g.22921C>T(Ala79Val)               |
| chr14                                                  | 73186877        | EX6 TM-III       | g.38802T>C(Ser169Pro)              |
| chr14                                                  | 73186881        | EX6 TM-III       | g.38806C>T(Ser170Phe)              |
| chr14                                                  | 73192712        | EX7 TM-IV        | g.44636G>C(Gly206Ala)              |
| chr14                                                  | 73198052        | EX8 HL-VI a      | g.49976C>T(Pro264Leu)              |
| chr14                                                  | 73198067        | EX8 HL-VI a      | g.49991G>A(Arg269His)              |
| chr14                                                  | 73211906        | EX10 HL-VI<br>b  | g.63824T>G(Ser365Ala)              |
| chr14                                                  | 73217170        | EX11 TM-VII      | g.69088C>G(Leu392Val)              |
| chr14                                                  | 73219161        | EX12 TM-<br>VIII | g.71080G>C(Ala426Pro)              |
| chr14                                                  | 73219177        | EX12 HL-<br>VIII | g.71096C>A(Ala431Glu)              |
| chr21                                                  | 25891784        | EX17 TM-I        | g.275341G>A(Val717Ile;_London_APP) |
| chr21                                                  | 25891789        | EX17 TM-I        | g.275336T>C(Val715Ala;_German_APP) |



| <b>eTable 2. Results of Gene-Based Burden <i>t</i> Test for <i>APP</i></b> |        |        |        |                      |                                |
|----------------------------------------------------------------------------|--------|--------|--------|----------------------|--------------------------------|
| Set                                                                        | Emory  | UCSF   | ADCs   | <b>Meta-Analysis</b> | <b>Adjusted Meta-Analysis*</b> |
| Samples (n)                                                                | 381    | 181    | 1563   | 2125                 | 2088                           |
| Variants (n)                                                               | 8      | 6      | 14     | 26                   | 26                             |
| Average Allele Frequency (%)                                               | 0.13   | 0.27   | 0.05   | 0.032                | 0.033                          |
| Min MAF (%)                                                                | 0.13   | 0.27   | 0.032  | 0.024                | 0.024                          |
| Effect Size                                                                | 0.0057 | 0.0088 | 0.0018 | 0.0024               | 0.0021                         |
| P-value                                                                    | 0.32   | 0.4    | 0.38   | 0.076                | 0.055                          |
| All analyses were adjusted for Sex and the first 4 PCs                     |        |        |        |                      |                                |
| *adjusted for Sex, first 4 PCs, Apoe E4, ADC Center, and Sequencing Batch  |        |        |        |                      |                                |

| <b>eTable 3. Results of Gene-Based Burden <i>t</i> Test for <i>PSEN1</i></b> |           |          |          |               |                                |
|------------------------------------------------------------------------------|-----------|----------|----------|---------------|--------------------------------|
| Set                                                                          | Emor<br>y | UCS<br>F | ADCs     | Meta-Analysis | Adjusted<br>Meta-<br>Analysis* |
| Samples (n)                                                                  | 381       | 181      | 1563     | 2125          | 2088                           |
| Variants (n)                                                                 | 3         | 4        | 15       | 20            | 20                             |
| Average Allele Frequency (%)                                                 | 0.13      | 0.34     | 0.046    | 0.033         | 0.034                          |
| Min MAF (%)                                                                  | 0.13      | 0.28     | 0.032    | 0.024         | 0.024                          |
| Effect Size                                                                  | -0.11     | 0.42     | 0.41     | 0.37          | 0.21                           |
| P-value                                                                      | 0.7       | 0.056    | 0.000016 | 0.000011      | 0.0026                         |
| All analyses were adjusted for Sex and the first 4 PCs                       |           |          |          |               |                                |
| *adjusted for Sex, first 4 PCs, Apoe E4, ADC Center, and Sequencing Batch    |           |          |          |               |                                |

| <b>eTable 4. Results of Gene-Based Burden <i>t</i> Test for <i>PSEN2</i></b> |       |        |       |               |                         |
|------------------------------------------------------------------------------|-------|--------|-------|---------------|-------------------------|
| Set                                                                          | Emory | UCSF   | ADCs  | Meta-Analysis | Adjusted Meta-Analysis* |
| Samples (n)                                                                  | 381   | 181    | 1563  | 2125          | 2088                    |
| Variants (n)                                                                 | 6     | 6      | 14    | 22            | 22                      |
| Average Allele Frequency (%)                                                 | 0.22  | 0.28   | 0.057 | 0.044         | 0.045                   |
| Min MAF (%)                                                                  | 0.13  | 0.28   | 0.032 | 0.024         | 0.024                   |
| Effect Size                                                                  | -0.13 | -0.042 | 0.062 | 0.012         | -0.031                  |
| P-value                                                                      | 0.39  | 0.84   | 0.45  | 0.86          | 0.58                    |
| All analyses were adjusted for Sex and the first 4 PCs                       |       |        |       |               |                         |
| *adjusted for Sex, first 4 PCs, Apoe E4, ADC Center, and Sequencing Batch    |       |        |       |               |                         |

**eTable 5.** Variants Identified in *APOB*

| chrom | pos      | type | ref allele | alt allele | phastCons | phyloP | cad  | refSeq Allele Function | refSeq q ref Codon | refSeq q alt Codon | refSeq q ref Amino Acid | refSeq q alt Amino Acid | refSeq codon Position | refSeq codon Number | dbSNP name   | gnomad genomes Allele Frequency | gnomad exomes Allele Frequency |
|-------|----------|------|------------|------------|-----------|--------|------|------------------------|--------------------|--------------------|-------------------------|-------------------------|-----------------------|---------------------|--------------|---------------------------------|--------------------------------|
| chr2  | 21002683 | SNP  | G          | A          | 1         | 2.8    | 47   | stopGain               | CAA                | TAA                | Q                       | *                       | 1                     | 4247                | rs907126709  | !                               | 2.84998E-05                    |
| chr2  | 21002979 | SNP  | G          | T          | 0.26      | 2      | 23.9 | nonSynonymous          | GCC                | GAC                | A                       | D                       | 2                     | 4148                | rs756476242  | 3.23102E-05                     | 2.15159E-05                    |
| chr2  | 21003079 | SNP  | C          | A          | 0.48      | 0.51   | 22.5 | nonSynonymous          | GTT                | TTT                | V                       | F                       | 1                     | 4115                | rs765681925  | !                               | !                              |
| chr2  | 21004405 | SNP  | G          | T          | 1         | 4      | 23.7 | nonSynonymous          | ACC                | AAC                | T                       | N                       | 2                     | 3984                | !            | !                               | !                              |
| chr2  | 21004414 | SNP  | G          | A          | 1         | 4.78   | 25.8 | nonSynonymous          | CCA                | CTA                | P                       | L                       | 2                     | 3981                | rs886055575  | !                               | 8.12513E-06                    |
| chr2  | 21005113 | SNP  | A          | T          | 1         | 6.51   | 24.6 | nonSynonymous          | TCA                | ACA                | S                       | T                       | 1                     | 3919                | !            | !                               | !                              |
| chr2  | 21005124 | SNP  | G          | A          | 1         | 6.08   | 24.6 | nonSynonymous          | TCC                | TTC                | S                       | F                       | 2                     | 3915                | rs201990496  | 3.2281E-05                      | 2.03164E-05                    |
| chr2  | 21005559 | SNP  | A          | C          | 1         | 8.05   | 25.7 | nonSynonymous          | ATC                | AGC                | I                       | S                       | 2                     | 3770                | rs199954127  | 6.45911E-05                     | 4.0699E-05                     |
| chr2  | 21005813 | SNP  | C          | T          | 1         | 7.61   | 46   | stopGain               | TGG                | TGA                | W                       | *                       | 3                     | 3685                | !            | !                               | !                              |
| chr2  | 21006088 | SNP  | A          | G          | 0.99      | 2.32   | 21.4 | nonSynonymous          | TGG                | CGG                | W                       | R                       | 1                     | 3594                | rs61744288   | 0.00245446                      | 0.000610128                    |
| chr2  | 21006397 | SNP  | A          | G          | 1         | 5.05   | 24.7 | nonSynonymous          | TCC                | CCC                | S                       | P                       | 1                     | 3491                | !            | !                               | !                              |
| chr2  | 21006876 | SNP  | A          | G          | 1         | 9.32   | 25.2 | nonSynonymous          | ATT                | ACT                | I                       | T                       | 2                     | 3331                | !            | !                               | !                              |
| chr2  | 21006988 | SNP  | A          | G          | 1         | 5.14   | 23.6 | nonSynonymous          | TCA                | CCA                | S                       | P                       | 1                     | 3294                | rs12720855   | 0.0146631                       | 0.00388678                     |
| chr2  | 21007080 | SNP  | A          | G          | 1         | 5.39   | 22.9 | nonSynonymous          | TTC                | TCC                | F                       | S                       | 2                     | 3263                | !            | !                               | 4.06623E-06                    |
| chr2  | 21007648 | SNP  | A          | G          | 1         | 3.61   | 24.4 | nonSynonymous          | TAT                | CAT                | Y                       | H                       | 1                     | 3074                | !            | !                               | !                              |
| chr2  | 21007776 | SNP  | C          | T          | 1         | 7.91   | 27.9 | nonSynonymous          | GGA                | GAA                | G                       | E                       | 2                     | 3031                | !            | !                               | 4.06739E-06                    |
| chr2  | 21008055 | SNP  | T          | C          | 1         | 8.02   | 26   | nonSynonymous          | GAT                | GGT                | D                       | G                       | 2                     | 2938                | rs377687939  | 3.22914E-05                     | 4.06603E-06                    |
| chr2  | 21008655 | SNP  | A          | T          | 1         | 9.32   | 25.9 | nonSynonymous          | ATA                | AAA                | I                       | K                       | 2                     | 2738                | rs1032400403 | !                               | !                              |
| chr2  | 21009354 | SNP  | A          | T          | 0.01      | 2.48   | 36   | stopGain               | TTG                | TAG                | L                       | *                       | 2                     | 2505                | !            | !                               | !                              |
| chr2  | 21009538 | SNP  | G          | A          | 0.85      | 2.15   | 23.9 | nonSynonymous          | CGT                | TGT                | R                       | C                       | 1                     | 2444                | rs754565622  | 9.68617E-05                     | 8.55321E-05                    |
| chr2  | 21010453 | SNP  | T          | C          | 1         | 5.94   | 22.5 | nonSynonymous          | AAG                | GAG                | K                       | E                       | 1                     | 2139                | !            | !                               | !                              |
| chr2  | 21011296 | SNP  | T          | C          | 0.98      | 6.22   | 20.6 | nonSynonymous          | AAG                | GAG                | K                       | E                       | 1                     | 1858                | rs762535625  | !                               | !                              |
| chr2  | 21011334 | SNP  | G          | A          | 0.77      | 1.34   | 23   | nonSynonymous          | GCT                | GTT                | A                       | V                       | 2                     | 1845                | !            | !                               | !                              |
| chr2  | 21011427 | SNP  | A          | G          | 0.94      | 7.57   | 25.3 | nonSynonymous          | CTA                | CCA                | L                       | P                       | 2                     | 1814                | !            | !                               | !                              |

|      |          |     |   |   |      |      |      |               |     |     |   |   |   |      |             |             |             |
|------|----------|-----|---|---|------|------|------|---------------|-----|-----|---|---|---|------|-------------|-------------|-------------|
| chr2 | 21012272 | SNP | C | G | 0    | -0.8 | 22.9 | nonSynonymous | CAG | CAC | Q | H | 3 | 1532 | !           | !           | !           |
| chr2 | 21012586 | SNP | G | A | 1    | 8.98 | 25.4 | nonSynonymous | CAC | TAC | H | Y | 1 | 1428 | !           | !           | !           |
| chr2 | 21013198 | SNP | G | A | 1    | 4.75 | 24.2 | nonSynonymous | GCT | GTT | A | V | 2 | 1393 | rs143282164 | 0.000807285 | 0.000215325 |
| chr2 | 21013349 | SNP | G | A | 1    | 8.01 | 24.8 | nonSynonymous | CCC | TCC | P | S | 1 | 1343 | rs374427541 | !           | 2.43677E-05 |
| chr2 | 21013351 | SNP | A | G | 1    | 9.26 | 24.9 | nonSynonymous | ATT | ACT | I | T | 2 | 1342 | !           | !           | !           |
| chr2 | 21013517 | SNP | A | G | 1    | 5.73 | 24.4 | nonSynonymous | TAT | CAT | Y | H | 1 | 1287 | !           | !           | !           |
| chr2 | 21014512 | SNP | C | T | 1    | 3.75 | 23.8 | nonSynonymous | GAG | AAG | E | K | 1 | 1260 | rs144892654 | !           | !           |
| chr2 | 21015252 | SNP | T | C | 1    | 6.92 | 26.3 | nonSynonymous | AAG | GAG | K | E | 1 | 1173 | !           | !           | !           |
| chr2 | 21015260 | SNP | T | C | 1    | 6.92 | 27.7 | nonSynonymous | GAT | GGT | D | G | 2 | 1170 | !           | !           | 4.06167E-06 |
| chr2 | 21015480 | SNP | G | A | 1    | 2.59 | 24.3 | nonSynonymous | GCC | GTC | A | V | 2 | 1133 | !           | !           | !           |
| chr2 | 21015516 | SNP | T | C | 1    | 1.35 | 22.8 | nonSynonymous | AAG | AGG | K | R | 2 | 1121 | rs879255342 | !           | !           |
| chr2 | 21019069 | SNP | G | T | 1    | 6.57 | 26   | nonSynonymous | TCT | TAT | S | Y | 2 | 1015 | rs773281594 | !           | !           |
| chr2 | 21019726 | SNP | G | A | 1    | 2.86 | 20.8 | nonSynonymous | ACC | ATC | T | I | 2 | 999  | !           | !           | !           |
| chr2 | 21019808 | SNP | C | T | 1    | 7.78 | 32   | nonSynonymous | GGC | AGC | G | S | 1 | 972  | rs199893862 | !           | 5.68574E-05 |
| chr2 | 21022924 | SNP | T | C | 1    | 5.78 | 21.4 | nonSynonymous | GAG | GGG | E | G | 2 | 908  | !           | 3.22726E-05 | 8.12387E-06 |
| chr2 | 21023647 | SNP | G | A | 1    | 7.56 | 22.7 | nonSynonymous | CAC | TAC | H | Y | 1 | 828  | !           | !           | !           |
| chr2 | 21025036 | SNP | C | T | 0.86 | 0.22 | 22.4 | nonSynonymous | CGC | CAC | R | H | 2 | 778  | rs201595604 | 3.22789E-05 | 5.6862E-05  |
| chr2 | 21025078 | SNP | T | C | 1    | 4.82 | 28.9 | nonSynonymous | GAT | GGT | D | G | 2 | 764  | rs781111539 | !           | !           |
| chr2 | 21025123 | SNP | T | C | 1    | 6.57 | 24.2 | nonSynonymous | GAT | GGT | D | G | 2 | 749  | !           | !           | !           |
| chr2 | 21026793 | SNP | C | T | 1    | 3.42 | 24.7 | nonSynonymous | GAG | AAG | E | K | 1 | 747  | rs756379920 | !           | 4.06795E-06 |
| chr2 | 21027902 | SNP | T | A | 0.99 | 2.92 | 27.3 | nonSynonymous | AAC | TAC | N | Y | 1 | 665  | rs755666654 | !           | 3.24947E-05 |
| chr2 | 21027988 | SNP | T | C | 1    | 5.19 | 22.9 | nonSynonymous | AAC | AGC | N | S | 2 | 636  | !           | !           | !           |
| chr2 | 21028007 | SNP | A | G | 1    | 6.2  | 24.9 | nonSynonymous | TTC | CTC | F | L | 1 | 630  | !           | !           | !           |
| chr2 | 21028510 | SNP | A | C | 0.94 | 1.84 | 24.1 | nonSynonymous | CTT | CGT | L | R | 2 | 549  | rs745897939 | !           | 1.62862E-05 |
| chr2 | 21029662 | SNP | G | A | 1    | 0.27 | 27.4 | nonSynonymous | CGG | TGG | R | W | 1 | 532  | rs13306194  | 0.00913729  | 0.0108896   |
| chr2 | 21029679 | SNP | G | A | 1    | 7.09 | 33   | nonSynonymous | GCT | GTT | A | V | 2 | 526  | !           | !           | !           |
| chr2 | 21029719 | SNP | A | G | 1    | 8.36 | 27.2 | nonSynonymous | TGT | CGT | C | R | 1 | 513  | rs938250596 | !           | !           |

|      |          |     |   |   |      |      |      |               |     |     |   |   |   |     |             |             |             |
|------|----------|-----|---|---|------|------|------|---------------|-----|-----|---|---|---|-----|-------------|-------------|-------------|
| chr2 | 21032490 | SNP | G | A | 0.3  | 1.21 | 23.7 | nonSynonymous | CTT | TTT | L | F | 1 | 406 | !           | !           | !           |
| chr2 | 21033498 | SNP | C | T | 0.28 | 0.71 | 21.5 | nonSynonymous | GCA | ACA | A | T | 1 | 309 | rs141888564 | 0.000226025 | 0.000194959 |
| chr2 | 21034830 | SNP | C | T | 1    | 3.48 | 34   | nonSynonymous | CGC | CAC | R | H | 2 | 297 | rs147223101 | 0.000225967 | 7.30923E-05 |
| chr2 | 21035590 | SNP | G | A | 1    | 7.63 | 24.9 | nonSynonymous | TCC | TTC | S | F | 2 | 271 | rs750907137 | !           | 4.06187E-06 |
| chr2 | 21038001 | SNP | A | G | 1    | 4.59 | 26.9 | nonSynonymous | CTG | CCG | L | P | 2 | 165 | rs375285536 | !           | 4.06058E-06 |
| chr2 | 21038047 | SNP | G | A | 1    | 2.4  | 24.5 | nonSynonymous | CCT | TCT | P | S | 1 | 150 | !           | !           | 4.06062E-06 |

## References

1. Consortium UK, Walter K, Min JL, et al. The UK10K project identifies rare variants in health and disease. *Nature*. 2015;526(7571):82-90.
2. NACC. Description of available data. <http://www.alz.washington.edu/NONMEMBER/INVEST/desc.html>. Accessed 2015-06-08.
3. Beekly DL, Ramos EM, Lee WW, et al. The National Alzheimer's Coordinating Center (NACC) database: the Uniform Data Set. *Alzheimer Dis Assoc Disord*. 2007;21(3):249-258.
4. McKhann G, Drachman D, Folstein M, Katzman R, Price D, Stadlan EM. Clinical diagnosis of Alzheimer's disease: report of the NINCDS-ADRDA Work Group under the auspices of Department of Health and Human Services Task Force on Alzheimer's Disease. *Neurology*. 1984;34(7):939-944.
5. Wingo TS, Kotlar A, Cutler DJ. MPD: multiplex primer design for next-generation targeted sequencing. *BMC bioinformatics*. 2017;18(1):14.
6. Johnston HR, Chopra P, Wingo TS, et al. PEMapper and PECaller provide a simplified approach to whole-genome sequencing. *Proc Natl Acad Sci U S A*. 2017.
7. Kotlar AV, Trevino CE, Zwick ME, Cutler DJ, Wingo TS. Bystro: rapid online variant annotation and natural-language filtering at whole-genome scale. *Genome biology*. 2018;19(1):14.
8. Purcell S, Neale B, Todd-Brown K, et al. PLINK: a tool set for whole-genome association and population-based linkage analyses. *Am J Hum Genet*. 2007;81(3):559-575.
9. Patterson N, Price AL, Reich D. Population Structure and Eigenanalysis. *PLoS Genet*. 2006;2(12):e190.
10. Cruts M. Alzheimer Disease & Frontotemporal Dementia Mutation Database. <http://www.molgen.ua.ac.be/ADMutations>. Accessed 08-30-2016, 2016.
11. Landrum MJ, Lee JM, Benson M, et al. ClinVar: public archive of interpretations of clinically relevant variants. *Nucleic Acids Res*. 2016;44(D1):D862-868.
12. *R: A Language and Environment for Statistical Computing* [computer program]. R Foundation for Statistical Computing; 2016.
13. Wingo TS, Lah JJ, Levey AI, Cutler DJ. Autosomal recessive causes likely in early-onset Alzheimer disease. *Archives of neurology*. 2012;69(1):59-64.
